# Supplementary material for: Association between Branched-Chain Amino Acid Intake and Physical Function among Chinese Community-Dwelling Elderly Residents
Source: MDPI journal article supplement (doi:10.3390/nu14204367), 2022-10-18
Supplement: s1 [file s1]

# Association between Branched-Chain Amino Acid Intake and Physical Function among Chinese Community-Dwelling Elderly Residents

Minqi Liao <sup>1,2,3,4,5,†</sup>, Yingjun Mu <sup>1,2,4,5,†</sup>, Xin Su <sup>2,4,5</sup>, Lu Zheng <sup>2,4,5</sup>, Shiwen Zhang <sup>2,4,5</sup>, Hongen Chen <sup>1</sup>, Shan Xu <sup>1</sup>, Junrong Ma <sup>2,4,5</sup>, Ruiqing Ouyang <sup>2,4,5</sup>, Wanlin Li <sup>2,4,5</sup>, Chen Cheng <sup>2,4,5</sup>, Jun Cai <sup>2,4,5</sup>, Yuming Chen <sup>6</sup>, Changyi Wang <sup>1,\*</sup> and Fangfang Zeng <sup>2,4,5,\*</sup>

## Supplementary materials

### Table legends:

- Table S1. Leading seven nutrients of study participants by quartiles of isoleucine, leucine, valine intake ( $n = 4336$ )
- Table S2. Covariate-adjusted mean changes in four physical performance indicators by quartiles of total BCAAs intakes in sup-population excluding those with coronary heart disease ( $n = 3753$ )
- Table S3. Covariate-adjusted mean changes in four physical performance indicators by quartiles of total BCAAs intakes in sup-population excluding those with myocardial infarction ( $n = 4273$ )
- Table S4. Covariate-adjusted mean changes in four physical performance indicators by quartiles of total BCAAs intakes in sup-population excluding those with stroke ( $n = 4166$ )
- Table S5. Covariate-adjusted mean changes in four physical performance indicators by quartiles of total BCAAs intakes in sup-population excluding those with angina pectoris ( $n = 4256$ )

**Table S1.** Leading seven nutrients of study participants by quartiles of isoleucine, leucine, valine intake ( $n = 4336$ ).

|                               | Isoleucine       |                  |                      |                      | Leucine           |                  |                      |                      | Valine           |                  |                      |                      |
|-------------------------------|------------------|------------------|----------------------|----------------------|-------------------|------------------|----------------------|----------------------|------------------|------------------|----------------------|----------------------|
|                               | Q1 <sup>a</sup>  | Q4 <sup>a</sup>  | P-value <sup>b</sup> | P-trend <sup>c</sup> | Q1 <sup>a</sup>   | Q4 <sup>a</sup>  | P-value <sup>b</sup> | P-trend <sup>c</sup> | Q1 <sup>a</sup>  | Q4 <sup>a</sup>  | P-value <sup>b</sup> | P-trend <sup>c</sup> |
| Energy intake (kcal/d)        | 1412.85 ± 521.31 | 1418.22 ± 486.06 | 0.852                | 0.786                | 1415.680 ± 521.16 | 1414.78 ± 487.52 | 0.872                | 0.896                | 1413.75 ± 519.99 | 1421.41 ± 491.72 | 0.911                | 0.607                |
| Fat (g/day)                   | 128.95 ± 91.81   | 120.93 ± 124.75  | <0.001               | 0.020                | 129.15 ± 91.82    | 120.41 ± 123.66  | 0.001                | 0.027                | 129.70 ± 91.77   | 120.91 ± 123.68  | <0.001               | 0.024                |
| Protein (g/day)               | 53.61 ± 13.82    | 53.76 ± 14.9     | 0.744                | 0.968                | 54.11 ± 17.39     | 53.96 ± 15.42    | 0.923                | 0.888                | 54.01 ± 17.21    | 54.05 ± 15.43    | 0.952                | 0.961                |
| Carbohydrate (g/day)          | 101.13 ± 90.16   | 114.68 ± 91.51   | <0.001               | <0.001               | 100.51 ± 89.92    | 114.06 ± 91.48   | <0.001               | <0.001               | 99.94 ± 90.04    | 113.54 ± 91.5    | <0.001               | <0.001               |
| Dietary soluble fiber (g/day) | 6.44 ± 8.41      | 7.03 ± 8.45      | 0.138                | 0.031                | 6.46 ± 8.44       | 6.95 ± 8.42      | 0.317                | 0.080                | 6.44 ± 8.46      | 6.95 ± 8.43      | 0.243                | 0.063                |
| Vitamin D (µg/day)            | 144.95 ± 167.94  | 130.83 ± 236.55  | 0.004                | 0.026                | 145.05 ± 167.98   | 127.09 ± 200.60  | 0.020                | 0.018                | 146.00 ± 168.71  | 128.05 ± 200.18  | 0.011                | 0.020                |
| Folate (µg/day)               | 170.22 ± 127.72  | 187.33 ± 130.41  | 0.002                | <0.001               | 171.96 ± 128.07   | 185.16 ± 128.84  | 0.009                | 0.006                | 171.34 ± 128.63  | 185.78 ± 129.64  | 0.006                | 0.003                |

Abbreviations: Q, quartile.

Note: Data are presented as mean ± standard deviation (SD);

<sup>a</sup> Cutoff values of BCAA quartiles are as follows:

Isoleucine: Q1:< 659.69 mg/d, Q2: 659.69~ 850.09 mg/d, Q3: 850.09~934.89 mg/d, Q4: ≥934.89 mg/d;

Leucine: Q1:< 1268.53 mg/d, Q2: 1268.53~1630.08 mg/d, Q3: 1630.08~1781.98 mg/d, Q4: ≥1781.98 mg/d;

Valine: Q1:< 876.02 mg/d, Q2: 876.02~1158.71mg/d, Q3: 1158.71~1257.01 mg/d, Q4: ≥1257.01 mg/d;

<sup>b</sup> P-value was calculated using the ANCOVA analysis for difference across quartiles of each type of BCAAs;

<sup>c</sup> P-trend was determined using a test for linear trend across quartiles of BCAAs.

**Table S2.** Covariate-adjusted mean changes in four physical performance indicators by quartiles of total BCAAs intakes in sup-population excluding those with coronary heart disease ( $n = 3753$ ).

|                             | Quartiles of BCAAs intake <sup>a</sup> |      |      |      |      |      |      |      | MD    | P-trend |
|-----------------------------|----------------------------------------|------|------|------|------|------|------|------|-------|---------|
|                             | Q1                                     |      | Q2   |      | Q3   |      | Q4   |      |       |         |
|                             | Mean                                   | SE   | Mean | SE   | Mean | SE   | Mean | SE   |       |         |
| Handgrip strength           |                                        |      |      |      |      |      |      |      |       |         |
| Crude                       | 21.5                                   | 0.27 | 22.7 | 0.27 | 23.7 | 0.27 | 24.4 | 0.27 | 2.90  | <0.001  |
| Model 1                     | 22.7                                   | 0.23 | 23.6 | 0.23 | 24.2 | 0.23 | 24.4 | 0.23 | 1.66  | <0.001  |
| Model 2                     | 22.7                                   | 0.31 | 23.6 | 0.29 | 24.2 | 0.30 | 24.5 | 0.30 | 1.70  | <0.001  |
| Model 3                     | 22.7                                   | 0.31 | 23.6 | 0.29 | 24.2 | 0.30 | 24.4 | 0.30 | 1.71  | <0.001  |
| 4-meter usual walking speed |                                        |      |      |      |      |      |      |      |       |         |
| Crude                       | 4.0                                    | 0.09 | 4.0  | 0.09 | 4.1  | 0.09 | 3.7  | 0.09 | −0.28 | 0.025   |
| Model 1                     | 4.0                                    | 0.09 | 4.0  | 0.09 | 4.1  | 0.09 | 3.8  | 0.09 | 0.24  | 0.071   |
| Model 2                     | 4.1                                    | 0.13 | 4.1  | 0.13 | 4.2  | 0.13 | 3.9  | 0.13 | 0.22  | 0.149   |
| Model 3                     | 4.1                                    | 0.13 | 4.1  | 0.13 | 4.2  | 0.13 | 3.8  | 0.13 | 0.22  | 0.135   |
| 4-meter fast walking speed  |                                        |      |      |      |      |      |      |      |       |         |
| Crude                       | 3.1                                    | 0.03 | 3.0  | 0.03 | 2.9  | 0.03 | 2.8  | 0.03 | 0.28  | <0.001  |
| Model 1                     | 3.0                                    | 0.03 | 3.0  | 0.03 | 2.9  | 0.03 | 2.8  | 0.03 | 0.24  | <0.001  |
| Model 2                     | 3.0                                    | 0.04 | 3.0  | 0.04 | 2.9  | 0.04 | 2.8  | 0.04 | 0.24  | <0.001  |
| Model 3                     | 3.0                                    | 0.04 | 3.0  | 0.04 | 2.9  | 0.04 | 2.8  | 0.04 | 0.25  | <0.001  |
| Repeated chair rises        |                                        |      |      |      |      |      |      |      |       |         |
| Crude                       | 11.7                                   | 0.13 | 11.4 | 0.13 | 11.0 | 0.13 | 10.7 | 0.13 | 0.99  | <0.001  |
| Model 1                     | 11.7                                   | 0.12 | 11.3 | 0.12 | 11.0 | 0.12 | 10.8 | 0.12 | 0.85  | <0.001  |
| Model 2                     | 11.9                                   | 0.16 | 11.3 | 0.16 | 11.1 | 0.16 | 10.9 | 0.16 | 0.90  | <0.001  |
| Model 3                     | 11.9                                   | 0.16 | 11.3 | 0.16 | 11.1 | 0.16 | 10.9 | 0.16 | 0.92  | <0.001  |

Abbreviations: BCAAs, Branched-chain amino acids; Q, quartile; SE, standard error; MD, mean difference.

Note:

<sup>a</sup> Cutoff values of BCAA quartiles are as follows: Q1:<131,71.538 mg/d, Q2:131,71.538~18194.861 mg/d, Q3:181,94.861~244,28.666 mg/d, Q4: ≥244,28.666 mg/d;.

<sup>b</sup> MD between quartile 4 and quartile 1 was calculated by ANCOVA.

<sup>c</sup> P-trend was determined using a test for linear trend across quartiles of BCAAs.

Model 1 was adjusted for age, sex.

Model 2 was additionally adjusted for BMI, smoking status, diabetes, hypertension, drinking status.

Model 3 was additionally adjusted for vitamin D, Fat, Carbohydrate.

**Table S3.** Covariate-adjusted mean changes in four physical performance indicators by quartiles of total BCAAs intakes in sup-population excluding those with myocardial infarction ( $n = 4273$ ).

|                             | Quartiles of BCAAs intake <sup>a</sup> |      |      |      |      |      |      |      | MD <sup>b</sup> | <i>P</i> -trend <sup>c</sup> |
|-----------------------------|----------------------------------------|------|------|------|------|------|------|------|-----------------|------------------------------|
|                             | Q1                                     |      | Q2   |      | Q3   |      | Q4   |      |                 |                              |
|                             | Mean                                   | SE   | Mean | SE   | Mean | SE   | Mean | SE   |                 |                              |
| Handgrip strength           |                                        |      |      |      |      |      |      |      |                 |                              |
| Crude                       | 21.4                                   | 0.26 | 22.8 | 0.26 | 23.6 | 0.26 | 24.4 | 0.26 | 2.97            | <0.001                       |
| Model 1                     | 22.6                                   | 0.22 | 23.6 | 0.22 | 24.2 | 0.22 | 24.3 | 0.22 | 1.68            | <0.001                       |
| Model 2                     | 22.7                                   | 0.29 | 23.6 | 0.28 | 24.2 | 0.29 | 24.4 | 0.28 | 1.66            | <0.001                       |
| Model 3                     | 22.6                                   | 0.29 | 23.5 | 0.28 | 24.1 | 0.29 | 24.4 | 0.28 | 1.76            | <0.001                       |
| 4-meter usual walking speed |                                        |      |      |      |      |      |      |      |                 |                              |
| Crude                       | 4.1                                    | 0.08 | 4.1  | 0.08 | 4.1  | 0.08 | 3.8  | 0.08 | −0.31           | 0.018                        |
| Model 1                     | 4.1                                    | 0.08 | 4.0  | 0.08 | 4.1  | 0.08 | 3.8  | 0.08 | −0.28           | 0.051                        |
| Model 2                     | 4.1                                    | 0.12 | 4.1  | 0.11 | 4.2  | 0.11 | 3.9  | 0.11 | −0.23           | 0.145                        |
| Model 3                     | 4.1                                    | 0.12 | 4.1  | 0.11 | 4.2  | 0.11 | 3.9  | 0.11 | −0.23           | 0.138                        |
| 4-meter fast walking speed  |                                        |      |      |      |      |      |      |      |                 |                              |
| Crude                       | 3.1                                    | 0.03 | 3.0  | 0.03 | 2.9  | 0.03 | 2.8  | 0.03 | −0.29           | <0.001                       |
| Model 1                     | 3.1                                    | 0.03 | 3.0  | 0.03 | 2.9  | 0.03 | 2.8  | 0.03 | −0.26           | <0.001                       |
| Model 2                     | 3.1                                    | 0.04 | 3.0  | 0.04 | 2.9  | 0.04 | 2.8  | 0.04 | −0.26           | <0.001                       |
| Model 3                     | 3.1                                    | 0.04 | 3.0  | 0.04 | 2.9  | 0.04 | 2.8  | 0.04 | −0.26           | <0.001                       |
| Repeated chair rises        |                                        |      |      |      |      |      |      |      |                 |                              |
| Crude                       | 11.8                                   | 0.12 | 11.5 | 0.12 | 11.1 | 0.12 | 10.9 | 0.12 | −0.87           | <0.001                       |
| Model 1                     | 11.7                                   | 0.12 | 11.5 | 0.12 | 11.1 | 0.12 | 11.0 | 0.12 | −0.78           | <0.001                       |
| Model 2                     | 12.0                                   | 0.15 | 11.5 | 0.15 | 11.3 | 0.15 | 11.1 | 0.15 | −0.84           | <0.001                       |
| Model 3                     | 12.0                                   | 0.15 | 11.5 | 0.15 | 11.3 | 0.15 | 11.1 | 0.15 | −0.85           | <0.001                       |

Abbreviations: BCAAs, Branched-chain amino acids; Q, quartile; SE, standard error; MD, mean difference.

Note:

<sup>a</sup> Cutoff values of BCAA quartiles are as follows: Q1:<132,24.325 mg/d, Q2:132,24.325~182,97.085 mg/d, Q3:182,97.085~243,93.464 mg/d, Q4: ≥243,93.464 mg/d;

<sup>b</sup> MD between quartile 4 and quartile 1 was calculated by ANCOVA.

<sup>c</sup> P-trend was determined using a test for linear trend across quartiles of BCAAs.

Model 1 was adjusted for age, sex.

Model 2 was additionally adjusted for BMI, smoking status, diabetes, hypertension, drinking status.

Model 3 was additionally adjusted for vitamin D, Fat, Carbohydrate.

**Table S4.** Covariate-adjusted mean changes in four physical performance indicators by quartiles of total BCAAs intakes in sup-population excluding those with stroke ( $n = 4166$ ).

|                             | Quartiles of BCAAs intake <sup>a</sup> |      |      |      |      |      |      |      | MD <sup>b</sup> | <i>P</i> -trend <sup>c</sup> |
|-----------------------------|----------------------------------------|------|------|------|------|------|------|------|-----------------|------------------------------|
|                             | Q1                                     |      | Q2   |      | Q3   |      | Q4   |      |                 |                              |
|                             | Mean                                   | SE   | Mean | SE   | Mean | SE   | Mean | SE   |                 |                              |
| Handgrip strength           |                                        |      |      |      |      |      |      |      |                 |                              |
| Crude                       | 21.4                                   | 0.26 | 22.9 | 0.26 | 23.7 | 0.26 | 24.4 | 0.26 | 3.00            | <0.001                       |
| Model 1                     | 22.7                                   | 0.22 | 23.7 | 0.22 | 24.3 | 0.22 | 24.4 | 0.22 | 1.68            | <0.001                       |
| Model 2                     | 22.7                                   | 0.30 | 23.6 | 0.28 | 24.2 | 0.29 | 24.4 | 0.29 | 1.65            | <0.001                       |
| Model 3                     | 22.6                                   | 0.30 | 23.6 | 0.28 | 24.1 | 0.29 | 24.4 | 0.29 | 1.76            | <0.001                       |
| 4-meter usual walking speed |                                        |      |      |      |      |      |      |      |                 |                              |
| Crude                       | 4.1                                    | 0.08 | 4.0  | 0.08 | 3.9  | 0.08 | 3.9  | 0.08 | −0.15           | 0.494                        |
| Model 1                     | 4.1                                    | 0.08 | 4.0  | 0.08 | 3.9  | 0.08 | 4.0  | 0.08 | −0.11           | 0.503                        |
| Model 2                     | 4.1                                    | 0.12 | 4.1  | 0.11 | 4.0  | 0.12 | 4.1  | 0.12 | −0.07           | 0.862                        |
| Model 3                     | 4.1                                    | 0.12 | 4.1  | 0.11 | 4.0  | 0.12 | 4.1  | 0.12 | −0.06           | 0.893                        |
| 4-meter fast walking speed  |                                        |      |      |      |      |      |      |      |                 |                              |
| Crude                       | 3.1                                    | 0.03 | 3.0  | 0.03 | 2.9  | 0.03 | 2.8  | 0.03 | −0.27           | <0.001                       |
| Model 1                     | 3.1                                    | 0.03 | 3.0  | 0.03 | 2.9  | 0.03 | 2.8  | 0.03 | −0.24           | <0.001                       |
| Model 2                     | 3.1                                    | 0.04 | 3.0  | 0.04 | 2.9  | 0.04 | 2.8  | 0.04 | −0.25           | <0.001                       |
| Model 3                     | 3.1                                    | 0.04 | 3.0  | 0.04 | 2.9  | 0.04 | 2.8  | 0.04 | −0.26           | <0.001                       |
| Repeated chair rises        |                                        |      |      |      |      |      |      |      |                 |                              |
| Crude                       | 11.7                                   | 0.12 | 11.4 | 0.12 | 11.0 | 0.12 | 10.8 | 0.12 | −0.93           | <0.001                       |
| Model 1                     | 11.7                                   | 0.12 | 11.4 | 0.12 | 11.0 | 0.12 | 10.9 | 0.12 | −0.83           | <0.001                       |
| Model 2                     | 11.9                                   | 0.15 | 11.2 | 0.15 | 11.2 | 0.15 | 11.0 | 0.15 | −0.89           | <0.001                       |
| Model 3                     | 12.0                                   | 0.16 | 11.4 | 0.15 | 11.2 | 0.15 | 11.0 | 0.15 | −0.91           | <0.001                       |

Abbreviations: BCAAs, Branched-chain amino acids; Q, quartile; SE, standard error; MD, mean difference.

Note:

<sup>a</sup> Cutoff values of BCAA quartiles are as follows: Q1:<131,83.665 mg/d, Q2:131,83.665~18271.014 mg/d, Q3:182,71.014~242,72.820 mg/d, Q4: ≥242,72.820 mg/d;

<sup>b</sup> MD between quartile 4 and quartile 1 was calculated by ANCOVA.

<sup>c</sup> P-trend was determined using a test for linear trend across quartiles of BCAAs.

Model 1 was adjusted for age, sex.

Model 2 was additionally adjusted for BMI, smoking status, diabetes, hypertension, drinking status.

Model 3 was additionally adjusted for vitamin D, Fat, Carbohydrate.

**Table S5.** Covariate-adjusted mean changes in four physical performance indicators by quartiles of total BCAAs intakes in sup-population excluding those with angina pectoris (*n* = 4256).

|                             | Quartiles of BCAAs intake <sup>a</sup> |      |      |      |      |      |      |      | MD <sup>b</sup> | P-trend <sup>c</sup> |
|-----------------------------|----------------------------------------|------|------|------|------|------|------|------|-----------------|----------------------|
|                             | Q1                                     |      | Q2   |      | Q3   |      | Q4   |      |                 |                      |
|                             | Mean                                   | SE   | Mean | SE   | Mean | SE   | Mean | SE   |                 |                      |
| Handgrip strength           |                                        |      |      |      |      |      |      |      |                 |                      |
| Crude                       | 21.4                                   | 0.26 | 22.8 | 0.26 | 23.6 | 0.26 | 24.4 | 0.26 | 3.03            | <0.001               |
| Model 1                     | 22.6                                   | 0.22 | 23.6 | 0.22 | 24.2 | 0.22 | 24.3 | 0.22 | 1.70            | <0.001               |
| Model 2                     | 22.7                                   | 0.29 | 23.5 | 0.28 | 24.1 | 0.29 | 24.4 | 0.28 | 1.69            | <0.001               |
| Model 3                     | 22.6                                   | 0.29 | 23.5 | 0.28 | 24.1 | 0.29 | 24.3 | 0.28 | 1.77            | <0.001               |
| 4-meter usual walking speed |                                        |      |      |      |      |      |      |      |                 |                      |
| Crude                       | 4.1                                    | 0.08 | 4.1  | 0.08 | 4.0  | 0.08 | 3.9  | 0.08 | −0.15           | 0.484                |
| Model 1                     | 4.1                                    | 0.08 | 4.0  | 0.08 | 3.9  | 0.08 | 4.0  | 0.08 | −0.12           | 0.517                |
| Model 2                     | 4.1                                    | 0.12 | 4.1  | 0.11 | 4.0  | 0.11 | 4.1  | 0.11 | −0.08           | 0.867                |
| Model 3                     | 4.1                                    | 0.12 | 4.1  | 0.11 | 4.0  | 0.11 | 4.1  | 0.11 | −0.08           | 0.889                |
| 4-meter fast walking speed  |                                        |      |      |      |      |      |      |      |                 |                      |
| Crude                       | 3.1                                    | 0.03 | 3.0  | 0.03 | 2.9  | 0.03 | 2.8  | 0.03 | −0.27           | <0.001               |
| Model 1                     | 3.1                                    | 0.03 | 3.0  | 0.03 | 2.9  | 0.03 | 2.8  | 0.03 | −0.24           | <0.001               |
| Model 2                     | 3.1                                    | 0.04 | 3.0  | 0.04 | 2.9  | 0.04 | 2.8  | 0.04 | −0.25           | <0.001               |
| Model 3                     | 3.1                                    | 0.04 | 3.0  | 0.04 | 2.9  | 0.04 | 2.8  | 0.04 | −0.26           | <0.001               |
| Repeated chair rises        |                                        |      |      |      |      |      |      |      |                 |                      |
| Crude                       | 11.8                                   | 0.12 | 11.5 | 0.12 | 11.1 | 0.12 | 10.9 | 0.12 | −0.90           | <0.001               |
| Model 1                     | 11.8                                   | 0.12 | 11.5 | 0.12 | 11.0 | 0.12 | 10.9 | 0.12 | −0.80           | <0.001               |
| Model 2                     | 12.0                                   | 0.15 | 11.5 | 0.15 | 11.2 | 0.15 | 11.1 | 0.15 | −0.86           | <0.001               |
| Model 3                     | 12.0                                   | 0.15 | 11.5 | 0.15 | 11.2 | 0.15 | 11.1 | 0.15 | −0.88           | <0.001               |

Abbreviations: BCAAs, Branched-chain amino acids; Q, quartile; SE, standard error; MD, mean difference.

Note:

<sup>a</sup> Cutoff values of BCAA quartiles are as follows: Q1:<131,86.911 mg/d, Q2:131,86.911~182,59.170 mg/d, Q3:182,59.170~242,66.475 mg/d, Q4: ≥242,66.475 mg/d;

<sup>b</sup> MD between quartile 4 and quartile 1 was calculated by ANCOVA.

<sup>c</sup> *P*-trend was determined using a test for linear trend across quartiles of BCAAs.

Model 1 was adjusted for age, sex.

Model 2 was additionally adjusted for BMI, smoking status, diabetes, hypertension, drinking status.

Model 3 was additionally adjusted for vitamin D, Fat, Carbohydrate.
